# Supplementary material
Source: publisher site journal article supplement (https://www.dovepress.com/article/601188)
Supplement: Supplementary file 1 [file 601188_Appendix%201.docx]

Appendix 1: Hydrocele and complication codes from TriNetX.

| Hydrocele or spermatocele diagnosis | ICD-10-CM N43 |
| --- | --- |
| Hydrocelectomy surgery | CPT 55040, 55041,55060, 54840, 55500, 1008601 |
| Hemorrhage, hematoma, and accidental puncture/laceration | ICD-10-CM N99.6, N99.7, N99.8 |
| Infection of skin, testes, or epididymis | ICD-10-CM N45.4, L03.90, L08.8, L08.9 |
| Unspecified disorders of skin, genital inflammation, and other procedural complications | ICD-10-CM N49, L98.8, L98.9, T81 |
| Emergency Department visits | CPT 1013711 |
| Hospital readmission | CPT 1013659 |
